# Supplementary material for: Enhanced skeletal muscle insulin sensitivity after acute resistance-type exercise is upregulated by rapamycin-sensitive mTOR complex 1 inhibition
Source: PubMed Central journal article supplement (PMC7244536; doi:10.1038/s41598-020-65397-z), 2020-05-22

# **Enhanced skeletal muscle insulin sensitivity after acute resistance-type exercise is upregulated by rapamycin-sensitive mTOR complex 1 inhibition**

Kohei Kido, Kohei Sase, Takumi Yokokawa, Satoshi Fujita

**Raw blots related to Figure 1**

# P-AMPK $\alpha$ Thr172

P-AMPK $\alpha$  Thr172 →

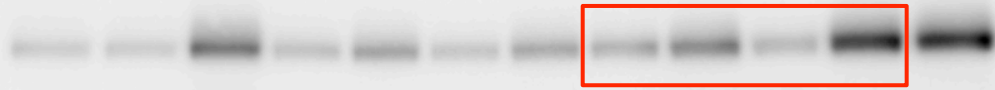

→

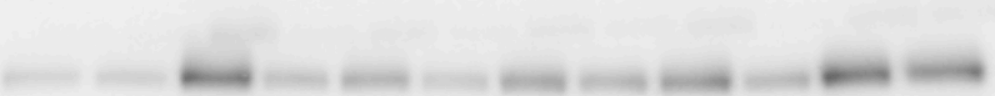

T-AMPK

T-AMPK →

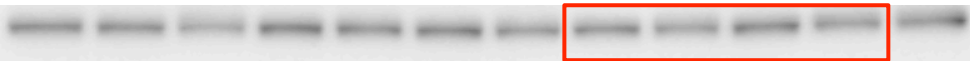

→

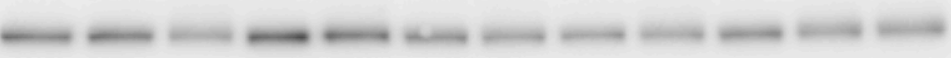

P-ACC Ser79

P-ACC Ser79 →

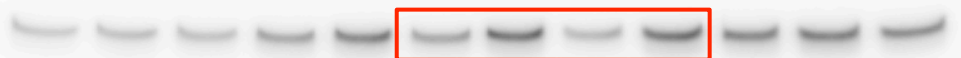

→

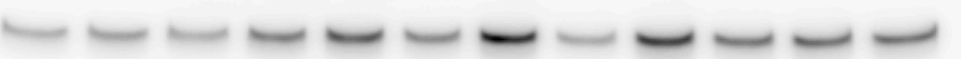



T-ACC

T-ACC →

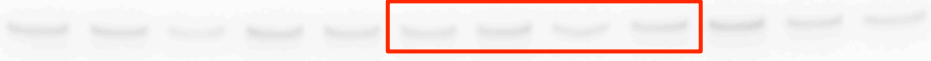

→

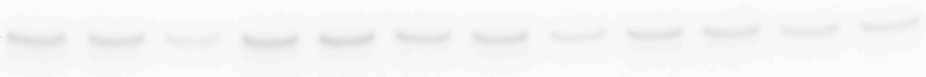

P-TBC1D1 Ser231  
T-TBC1D4  
P-TBC1D4 Thr651

P-TBC1D1 Ser231 →

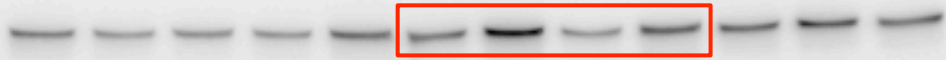

T-TBC1D4 →

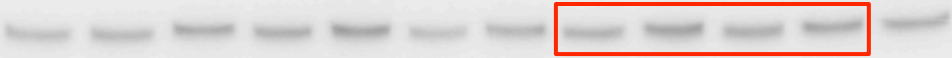

P-TBC1D4 Thr651 →

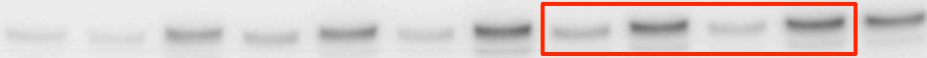

T-TBC1D1

T-TBC1D1 →

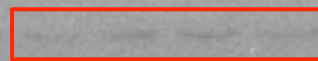

P-TBC1D4 Ser597

P-TBC1D4 Ser597 →

→

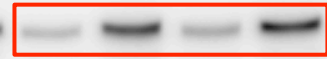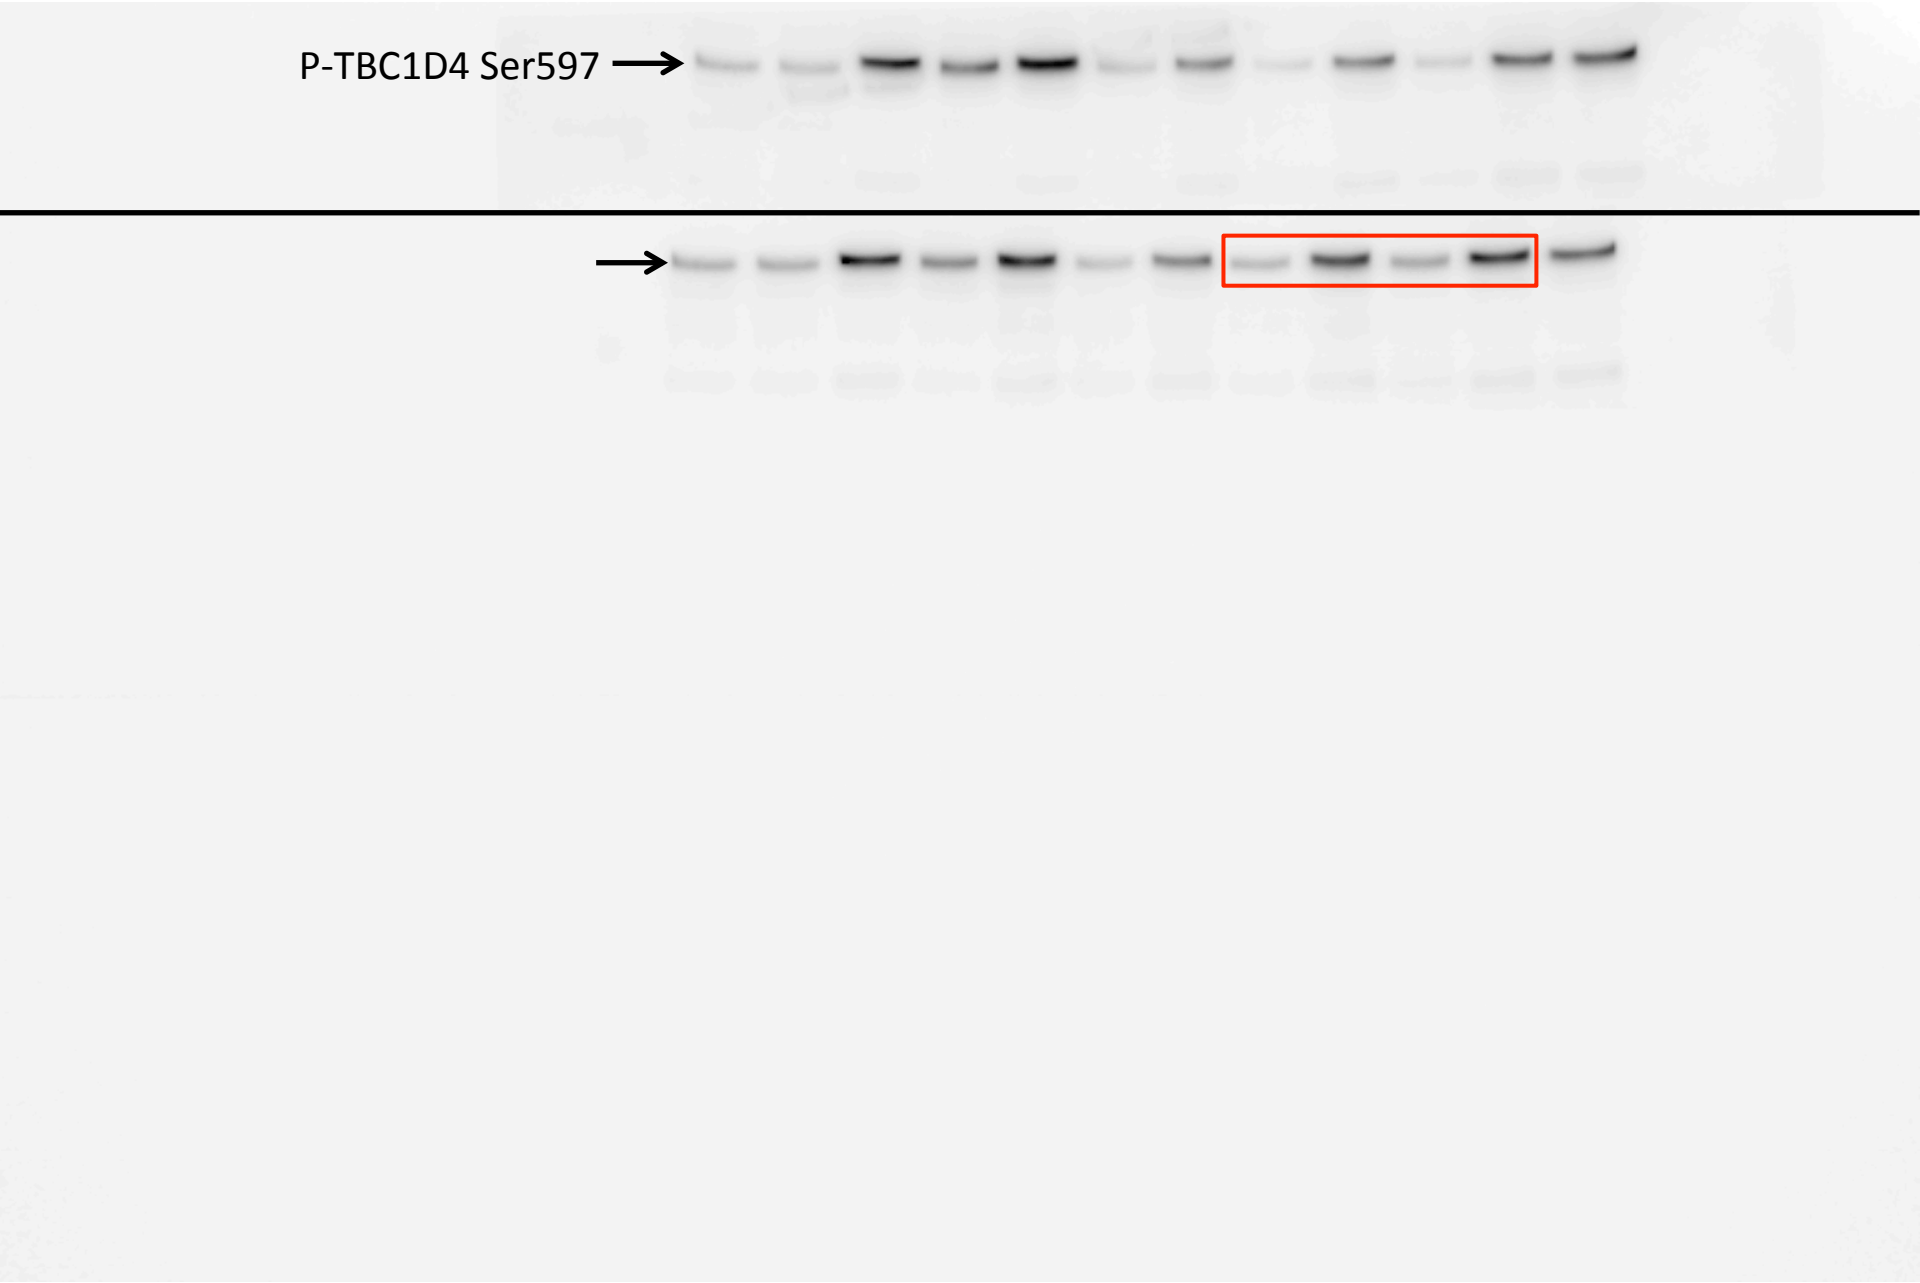

**Enhanced skeletal muscle insulin sensitivity after acute resistance-type exercise is upregulated by rapamycin-sensitive mTOR complex 1 inhibition**

Kohei Kido, Kohei Sase, Takumi Yokokawa, Satoshi Fujita

**Raw blots related to Figure 2**

# P-P70S6K Thr389

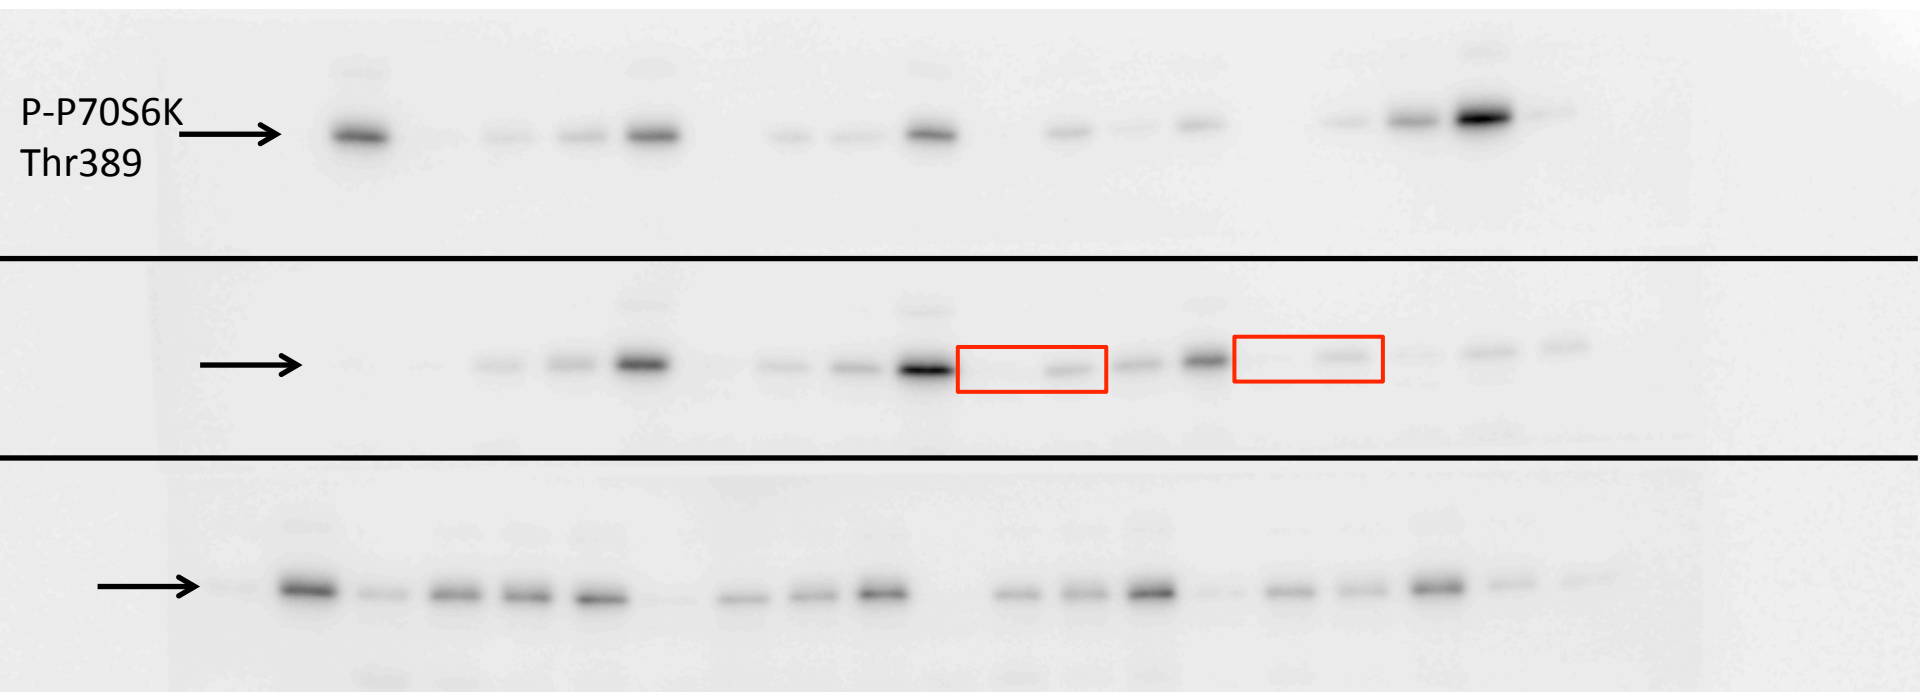

T-P70S6K

T-P70S6K →

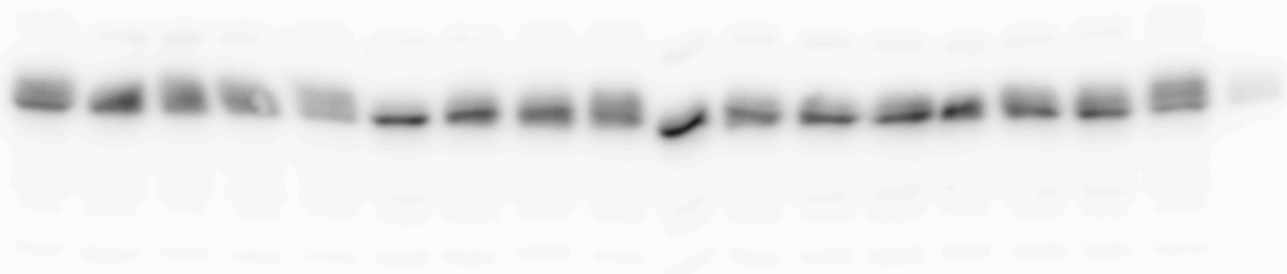

→

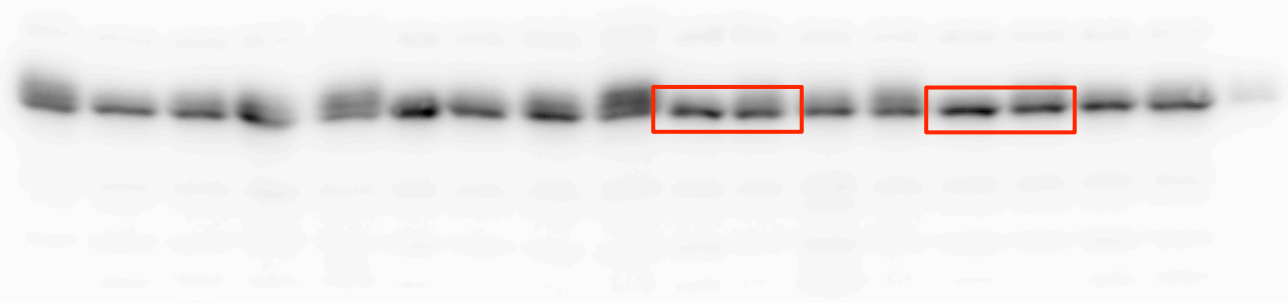

→

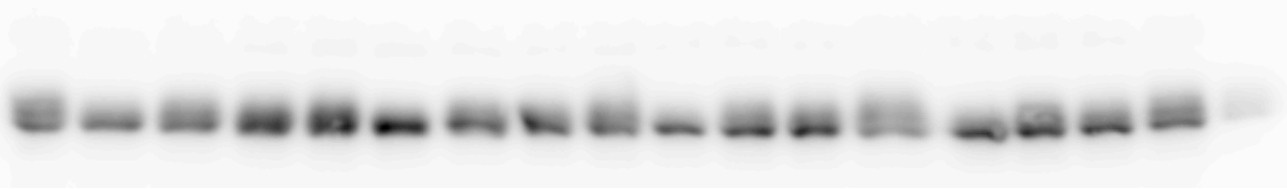

# P-IRS-1 Ser1100

P-IRS-1 Ser1100 →

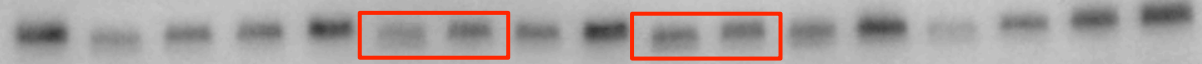

→

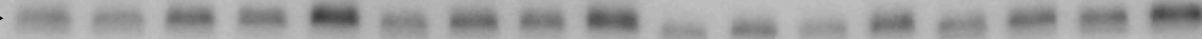

→

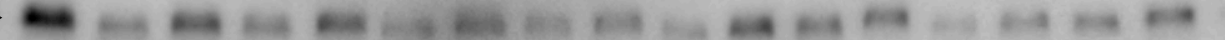



# P-IRS-1 Ser632/635

P-IRS-1 Ser632/635 →

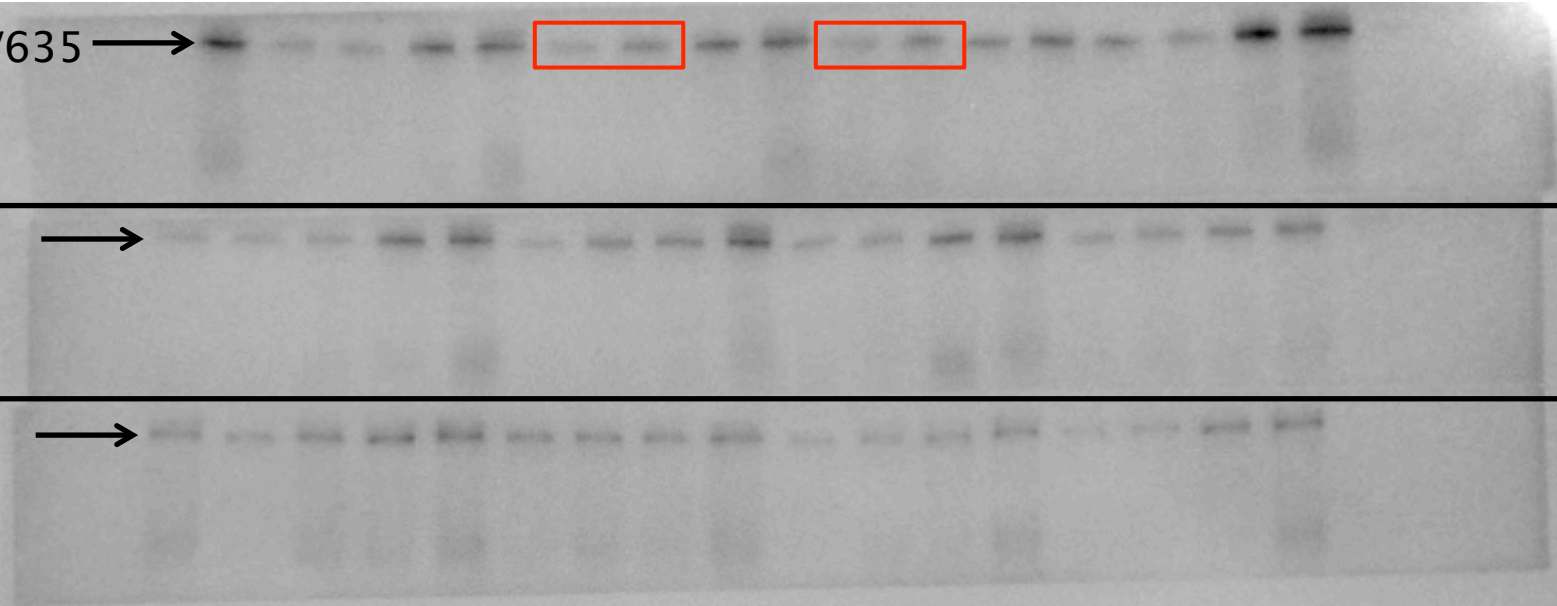

P-IRS-1 Ser612

P-IRS-1 Ser612 →

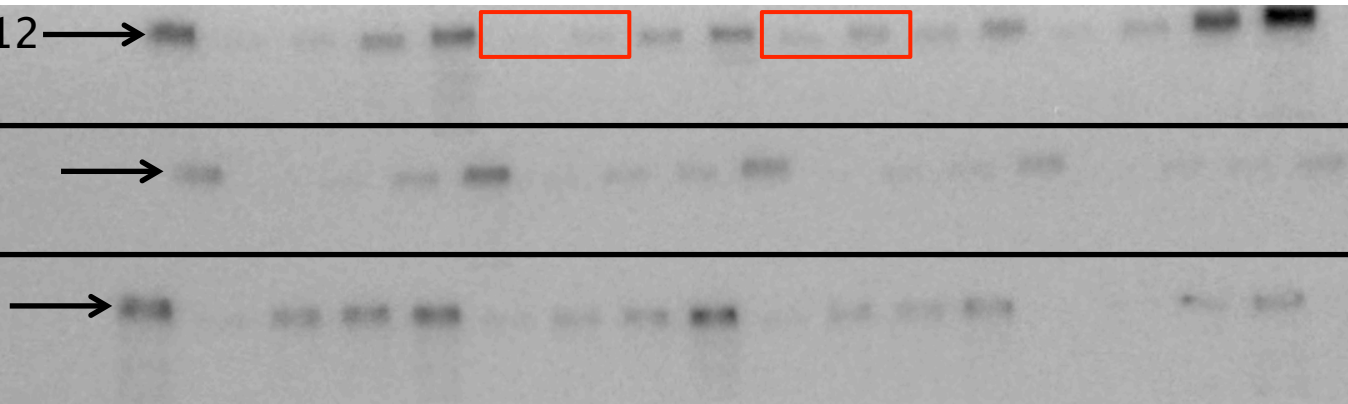

T-IRS-1

T-IRS-1 →

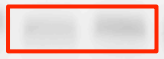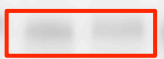

→

→

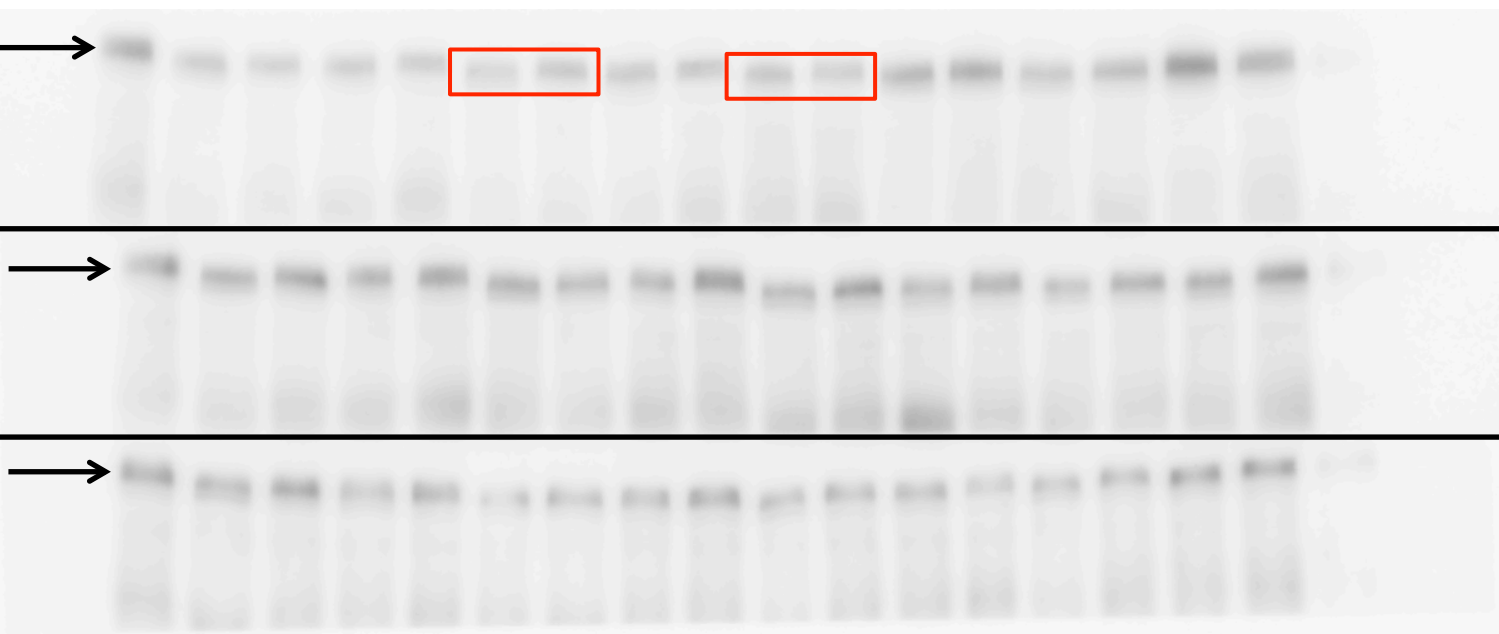

**Enhanced skeletal muscle insulin sensitivity after acute resistance-type exercise is upregulated by rapamycin-sensitive mTOR complex 1 inhibition**

Kohei Kido, Kohei Sase, Takumi Yokokawa, Satoshi Fujita

**Raw blots related to Figure 3**

P-Akt Thr308

P-Akt Thr308 →

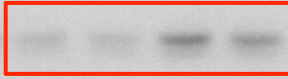

→

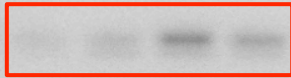

→

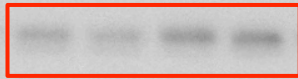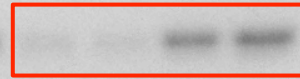

# P-Akt Ser473

P-Akt Ser473 →

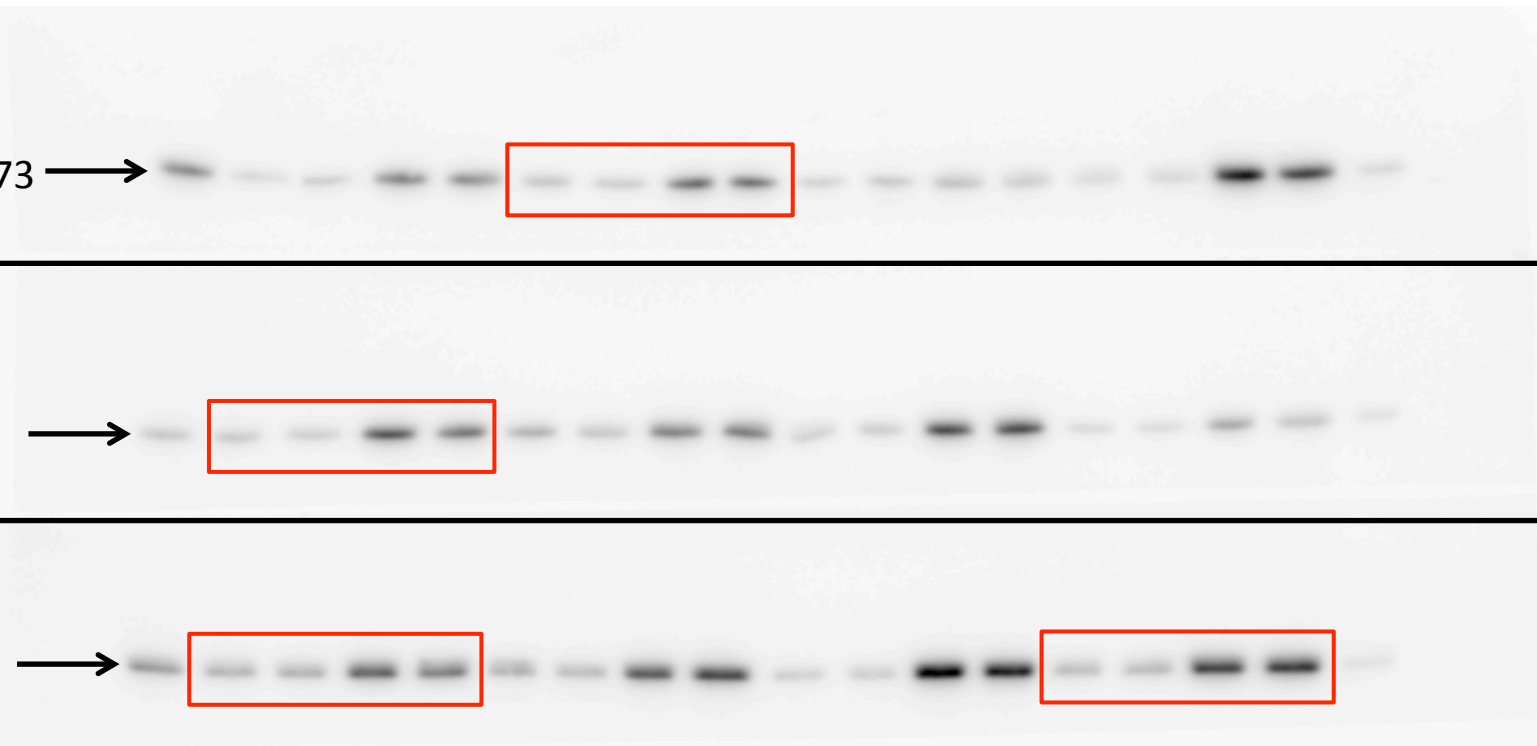

T-Akt

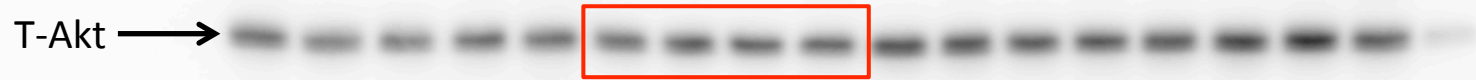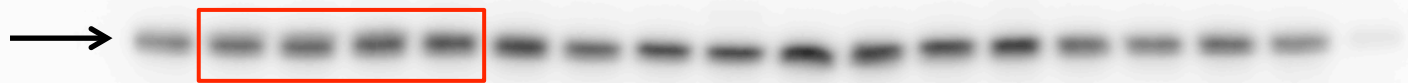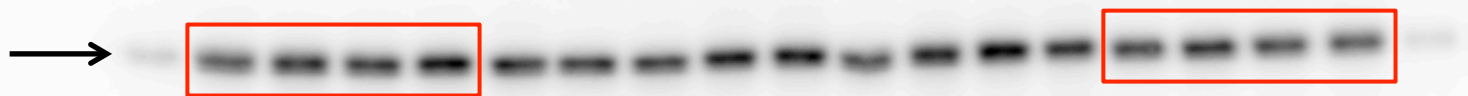

**Enhanced skeletal muscle insulin sensitivity after acute resistance-type exercise is upregulated by rapamycin-sensitive mTOR complex 1 inhibition**

Kohei Kido, Kohei Sase, Takumi Yokokawa, Satoshi Fujita

**Raw blots related to Figure 4**



# P-TBC1D1 Ser231

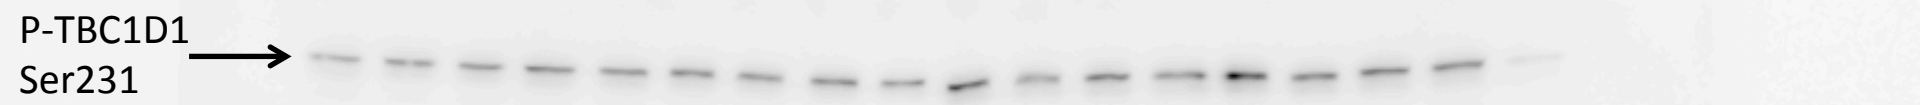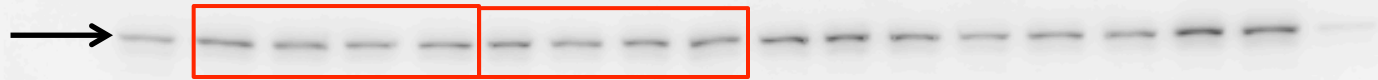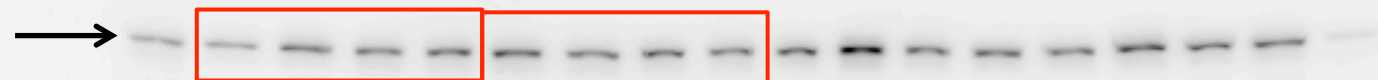

T-TBC1D1

T-TBC1D1 →

→

→

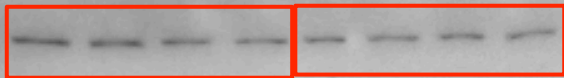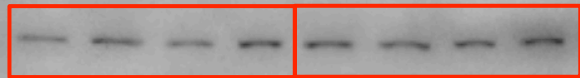

P-TBC1D4 Ser597

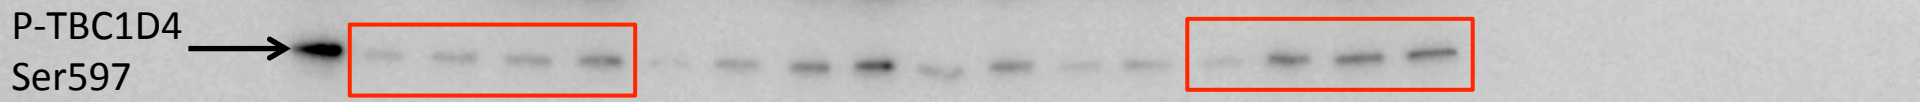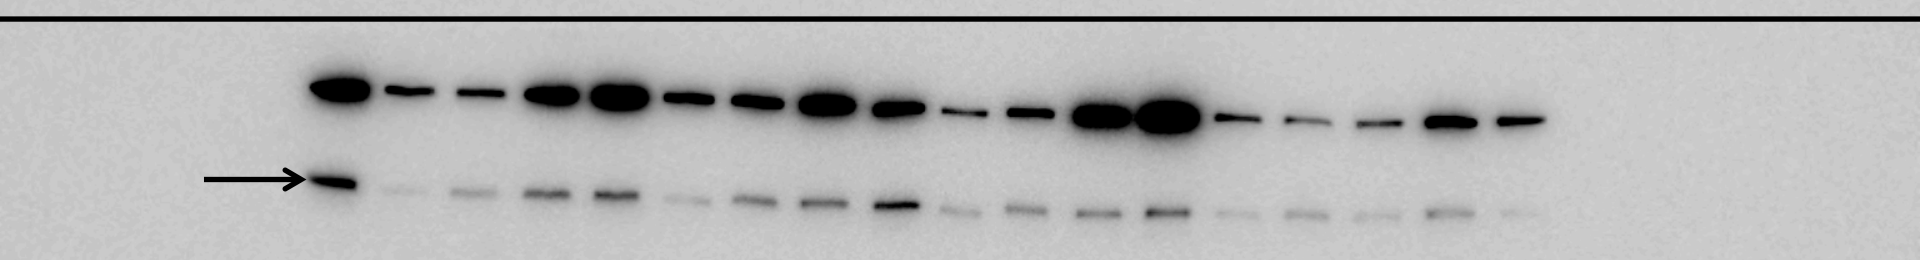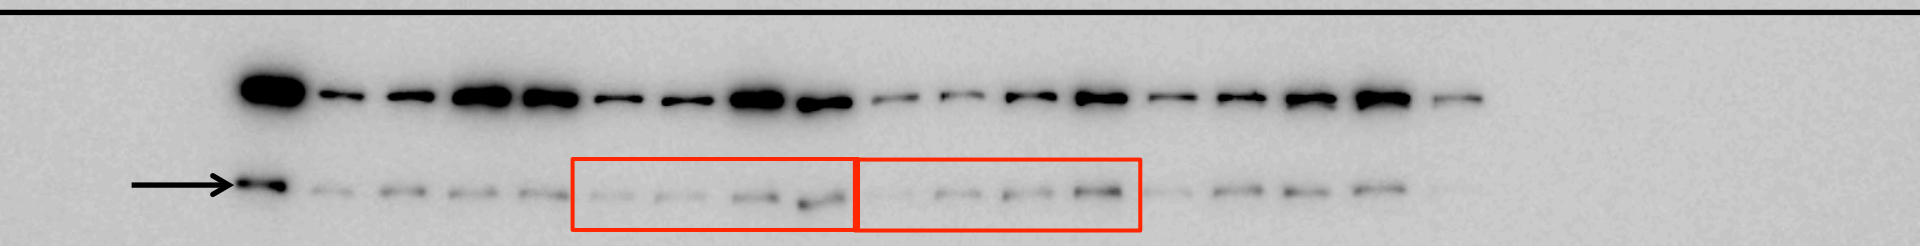

# P-TBC1D4 Thr651

P-TBC1D4  
Thr651

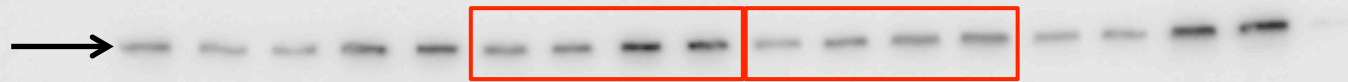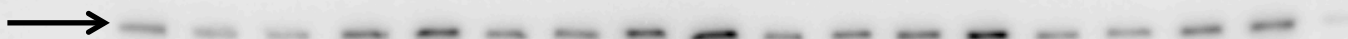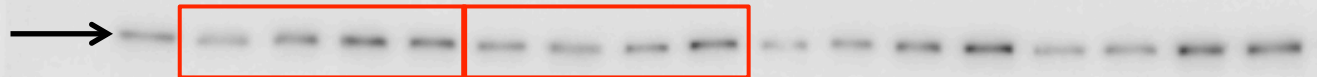

# T-TBC1D4

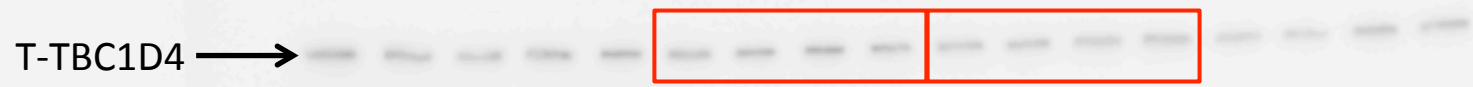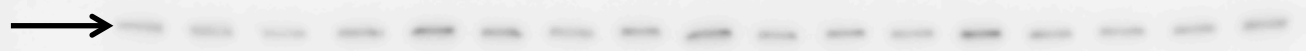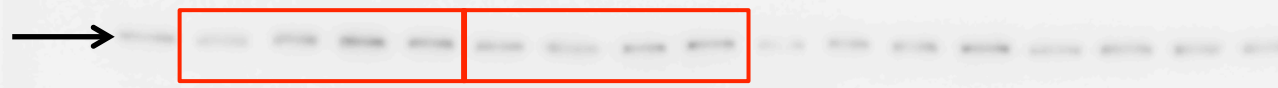

**Enhanced skeletal muscle insulin sensitivity after acute resistance-type exercise is upregulated by rapamycin-sensitive mTOR complex 1 inhibition**

Kohei Kido, Kohei Sase, Takumi Yokokawa, Satoshi Fujita

**Raw blots related to Figure 6**

P-P70S6K Thr389

P-P70S6K Thr389 →

→

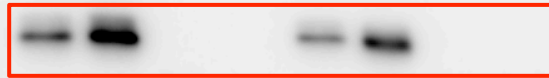

T-P70S6K

T-P70S6K →

→

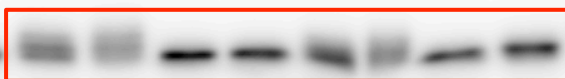



P-IRS-1 Ser1100

P-IRS-1 Ser1100

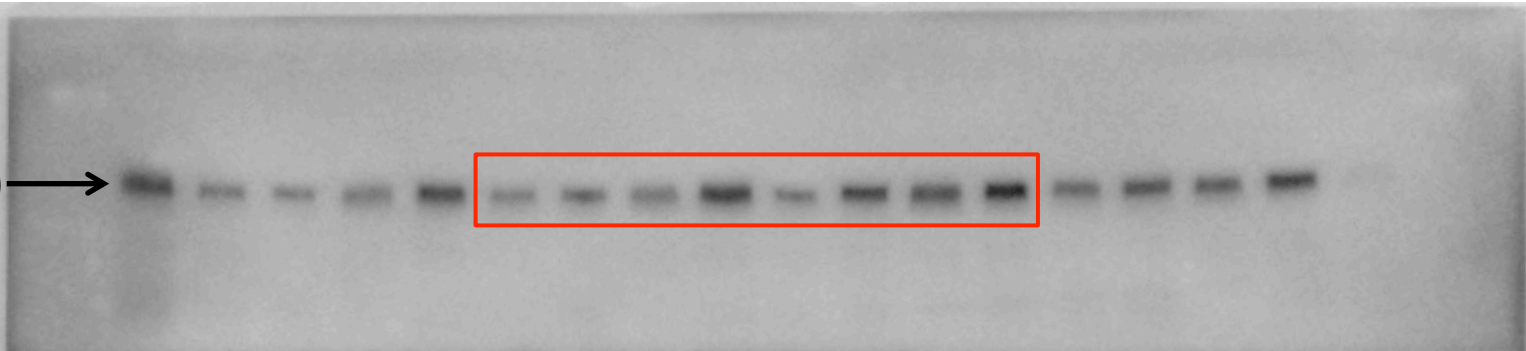

P-IRS-1 Ser632/635

P-IRS-1 Ser632/635 →

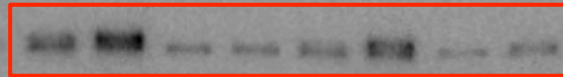

# P-IRS-1 Ser612

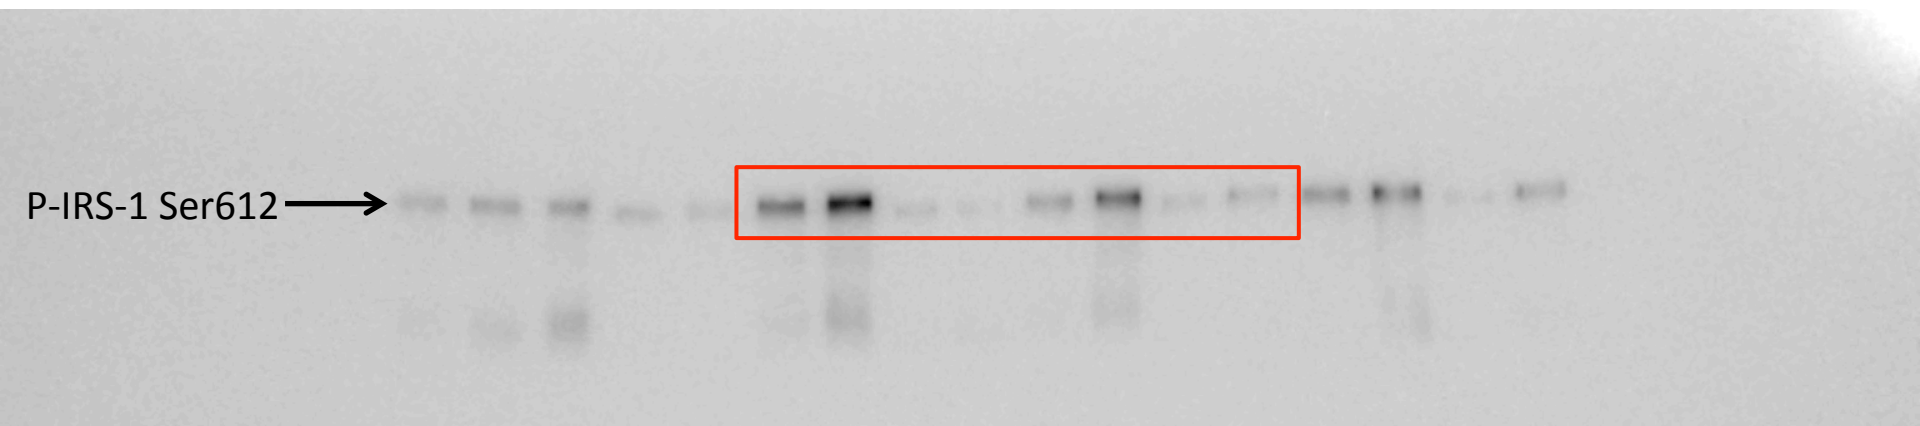

T-IRS-1

T-IRS-1 →

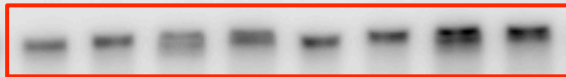

**Enhanced skeletal muscle insulin sensitivity after acute resistance-type exercise is upregulated by rapamycin-sensitive mTOR complex 1 inhibition**

Kohei Kido, Kohei Sase, Takumi Yokokawa, Satoshi Fujita

**Raw blots related to Figure 7**

P-Akt Thr308

P-Akt Thr308 →

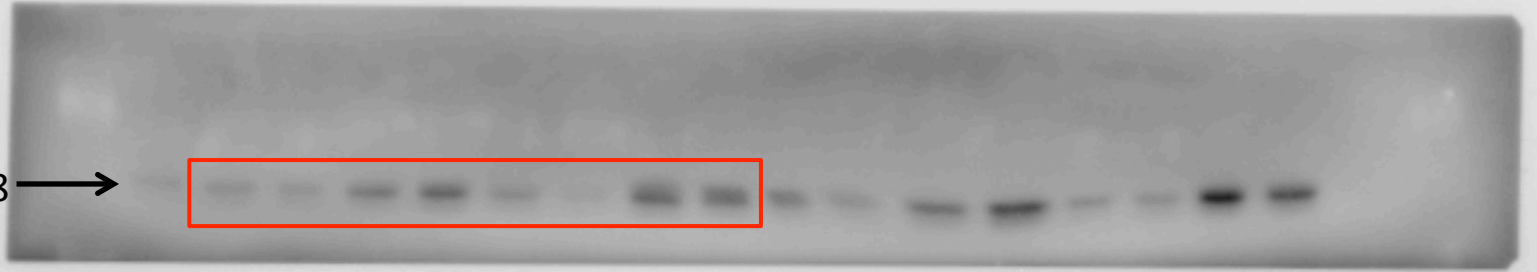

→

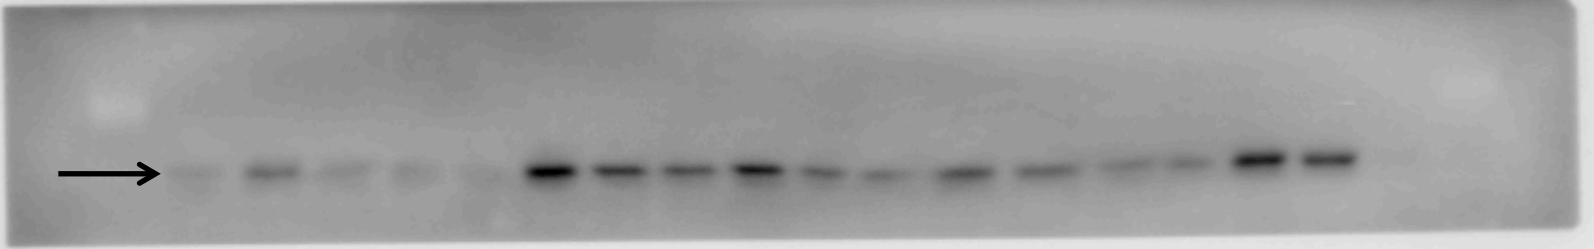

P-Akt Ser473

P-Akt Ser473

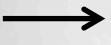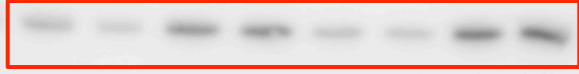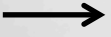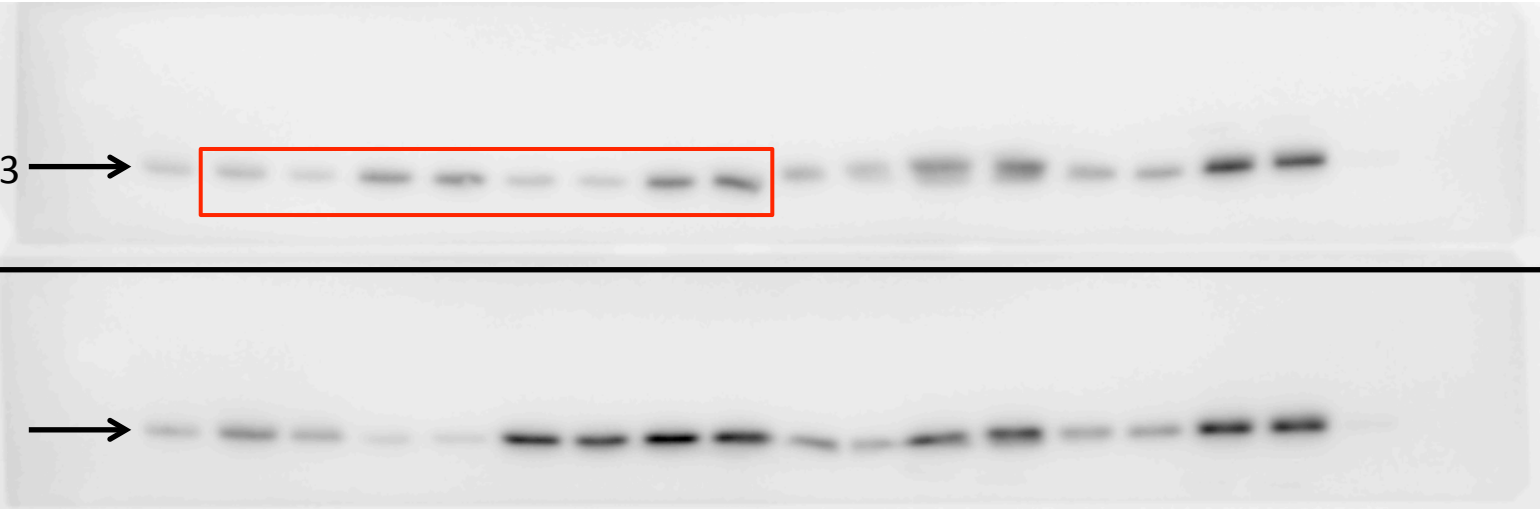

T-Akt

T-Akt →

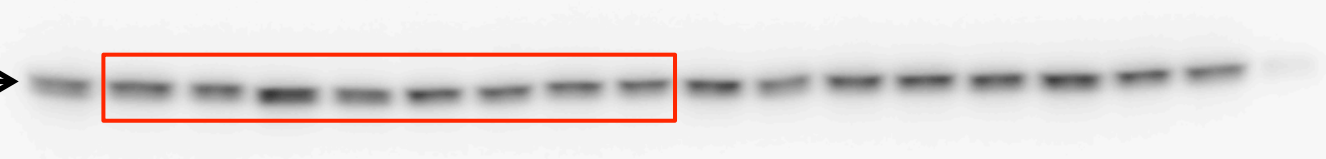

→

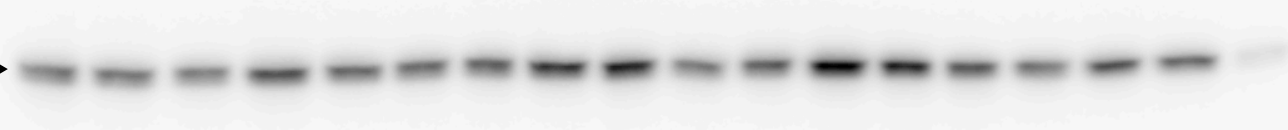



# P-TBC1D1 Ser231

P-TBC1D1  
Ser231

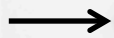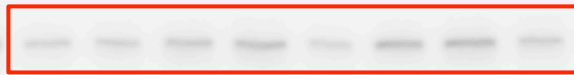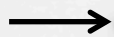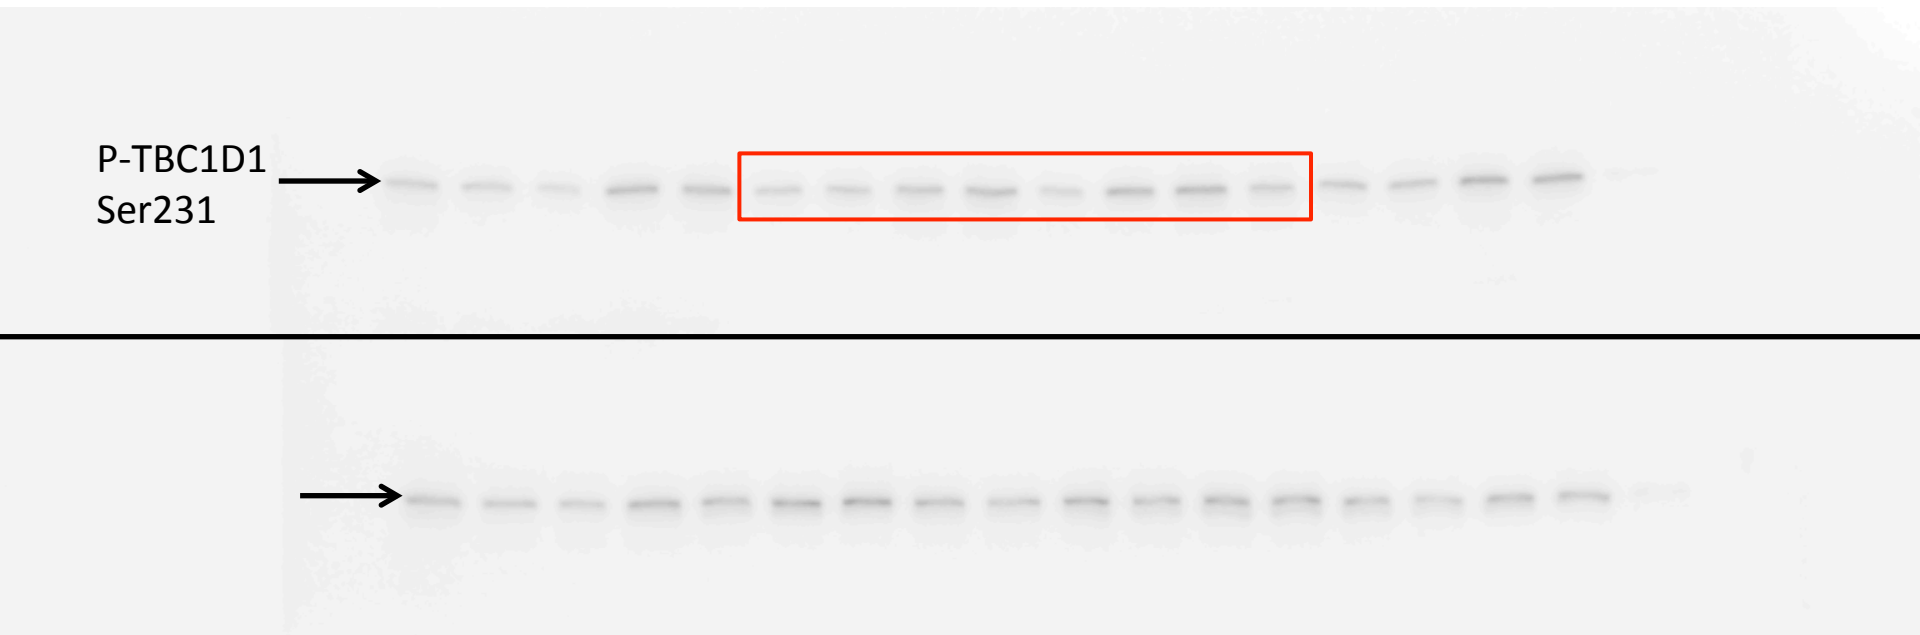

T-TBC1D1

T-TBC1D1 →

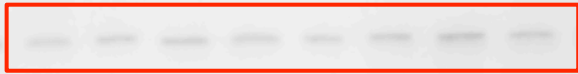

→

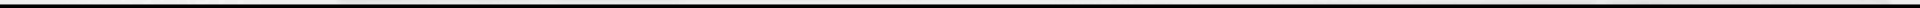

P-TBC1D4 Ser597

P-TBC1D4 Ser597 →

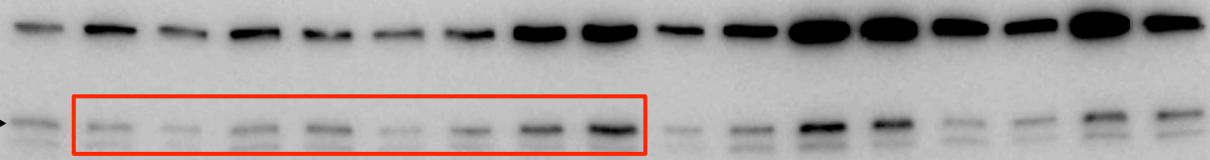

→

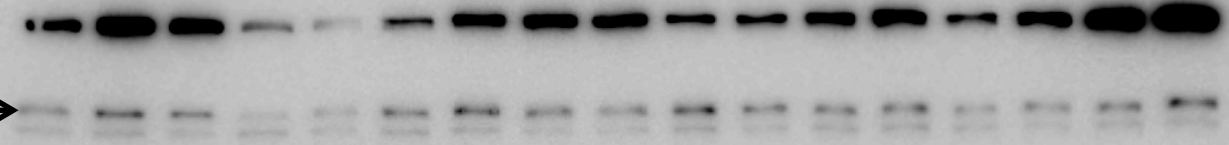

P-TBC1D4 Thr651

P-TBC1D4  
Thr651 →

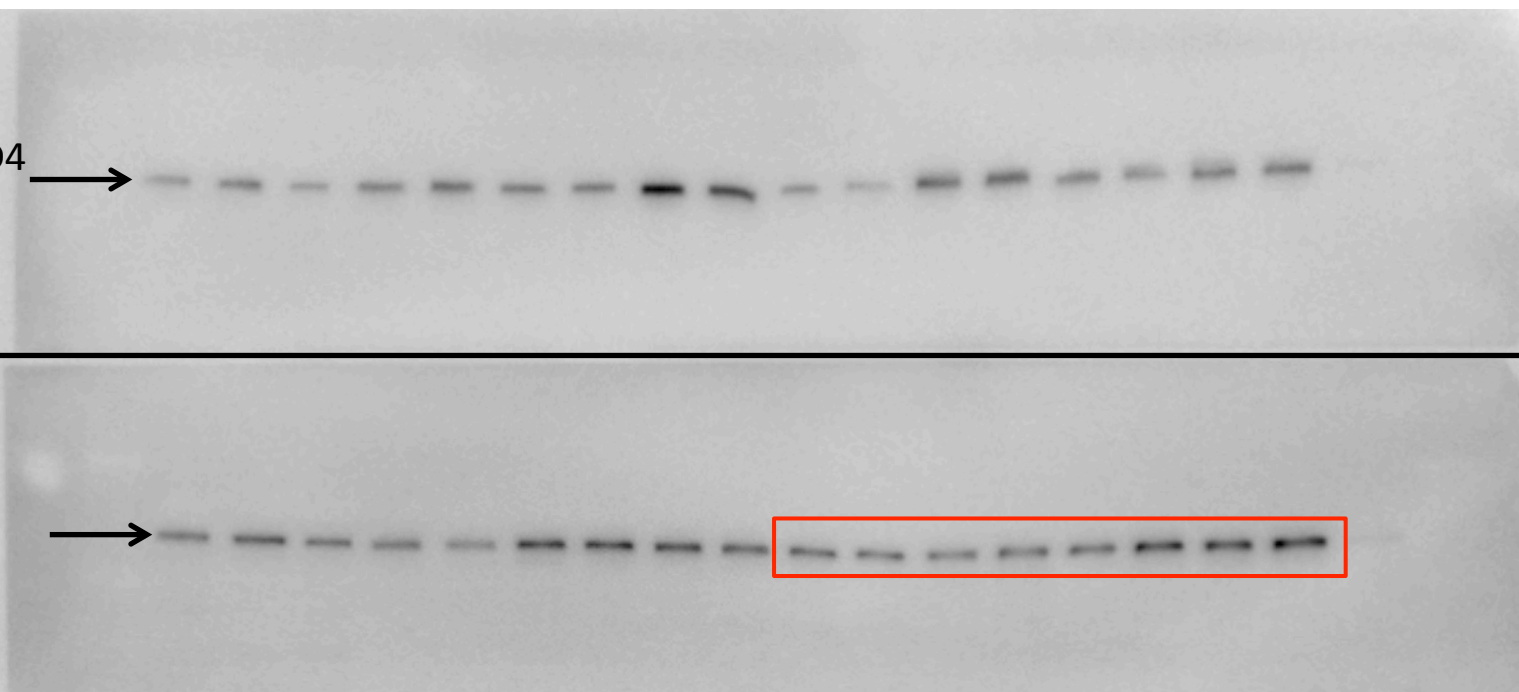

T-TBC1D4

T-TBC1D4 →

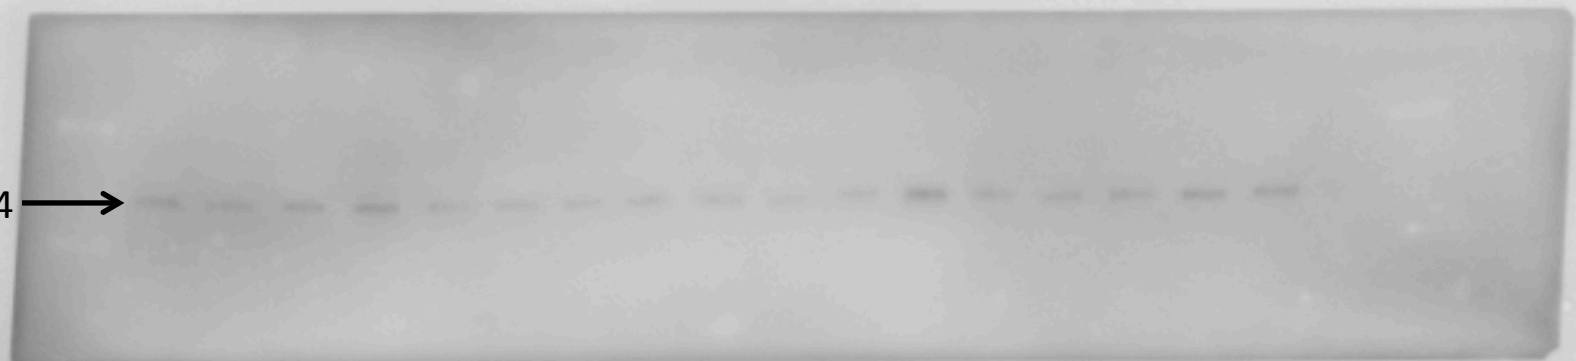

→

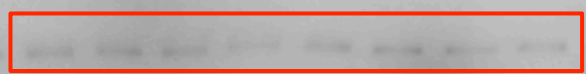

Supplement: 41598_2020_65397_MOESM1_ESM.pdf [file 41598_2020_65397_MOESM1_ESM.pdf]
